# Supplementary material for: A turn-on fluorescent sensor based on carbon dots from Sophora japonica leaves for the detection of glyphosate
Source: Royal Society of Chemistry journal article supplement (doi:10.1039/d0ay01241f), 2020-01-01
Supplement: d0ay01241f1.pdf [file d0ay01241f1.pdf]

## Electronic Supplementary Information

### A Turn-on Fluorescent Sensor Based on Carbon Dots from *Sophora Japonica* Leaves for Detection of Glyphosate

Jingzhou Hou<sup>1,2a</sup>, Xianfeng Wang<sup>3a</sup>, Shiyu Lan<sup>3</sup>, Chao Zhang<sup>2</sup>, Changjun Hou<sup>3</sup>, Qiang He<sup>1b</sup>,  
Danqun Huo<sup>3,4b</sup>

<sup>1</sup> Key Laboratory of Eco-Environment of Three Gorges Region of Ministry of Education, Faculty of Urban Construction and Environmental Engineering, Chongqing University, Chongqing 400045, PR China

<sup>2</sup> Solid-state Fermentation Resource Utilization Key Laboratory of Sichuan Province, Yibin University 644000, PR China

<sup>3</sup> Key Laboratory for Biorheological Science and Technology of Ministry of Education, State and Local Joint Engineering Laboratory for Vascular Implants, Bioengineering College of Chongqing University, Chongqing 400044, PR China

<sup>4</sup> Chongqing Key Laboratory of Bio-perception & Intelligent Information Processing, School of Microelectronics and Communication Engineering, Chongqing University, Chongqing, 400044, PR China

<sup>a</sup> Those authors contribute equally to the article

<sup>b</sup> Corresponding authors

E-mail addresses: heqiang0980@163.com

Tel.: +86 23 6512 7226

huodq@cqu.edu.cn

Tel.: +86 23 6511 2673

Figure S1

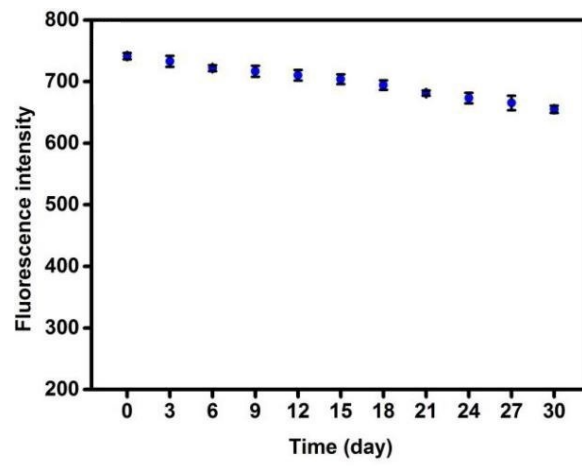

Figure S1 Stability of CDs with the time change.

Figure S2

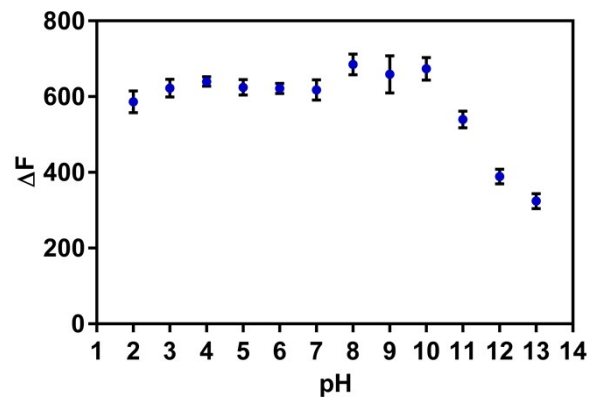

Figure S2. Fluorescence intensity of CDs with the pH change.

**Figure S2**

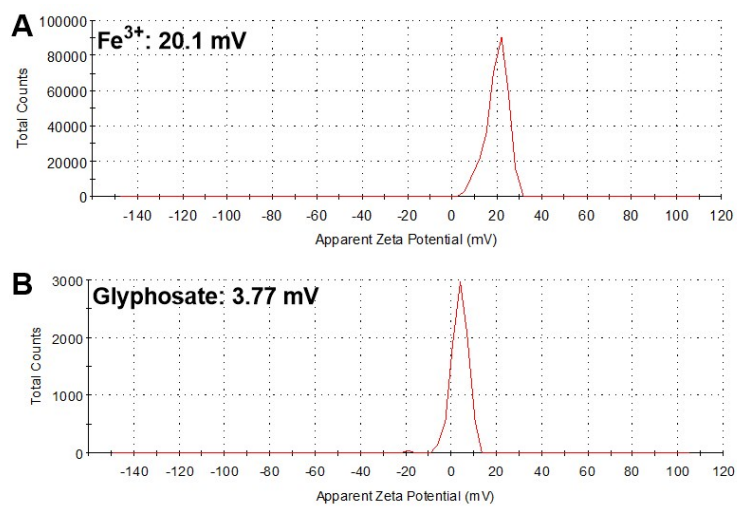

Figure S3 Zeta potentials of Fe<sup>3+</sup> (A) and glyphosate (B).

Figure S4

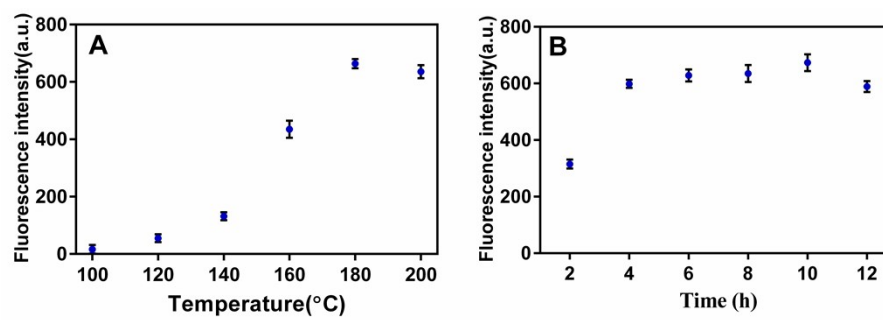

Figure S4. Fluorescence intensity of CDs with synthesis conditions change of temperature (A) and synthesis time (B).

**Figure S5**

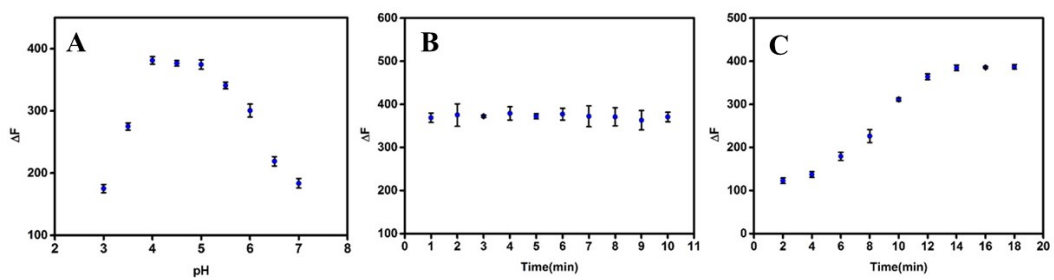

Figure S5 The influences of pH (A) , and the time of fluorescence quenching (B) and recovery (C) for the detection of glyphosate.

Figure S6

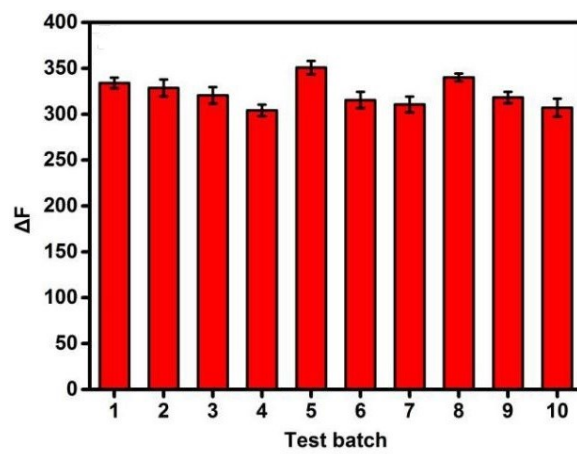

Figure S6 The reproducibility of the prepared CDs/Fe<sup>3+</sup> sensor in analyzing glyphosate (16 ppm)
